# Supplementary material for: The Evolution of Female Preference, Male Traits and the G matrix: “Toto, I've a feeling we're not in Kansas anymore”
Source: Research Square preprint supplement (doi:10.21203/rs.3.rs-4195108/v1), 2024-04-15
Supplement: Supplementary file 1 [file 95ae911cfd8ef2acf30a070b.docx]

**Supplementary Material**

**Figure S1:** Diagram of experimental setup. In generations 1 and 2 no motion detectors were used and the T tube was set at the top of the containers, thereby preventing the female from leaving a male’s cage after she entered it. Starting at generation 3 the T tube was moved to the bottom of the cage and the cones removed, thereby permitting a female to move between cages. Motion detectors were used to monitor the female’s movement. Output from the sound detectors and motion detectors were continually sent to a recording device and stored on an SD card. Song components were recorded at generation 3 and 11 using USB audio recorders.


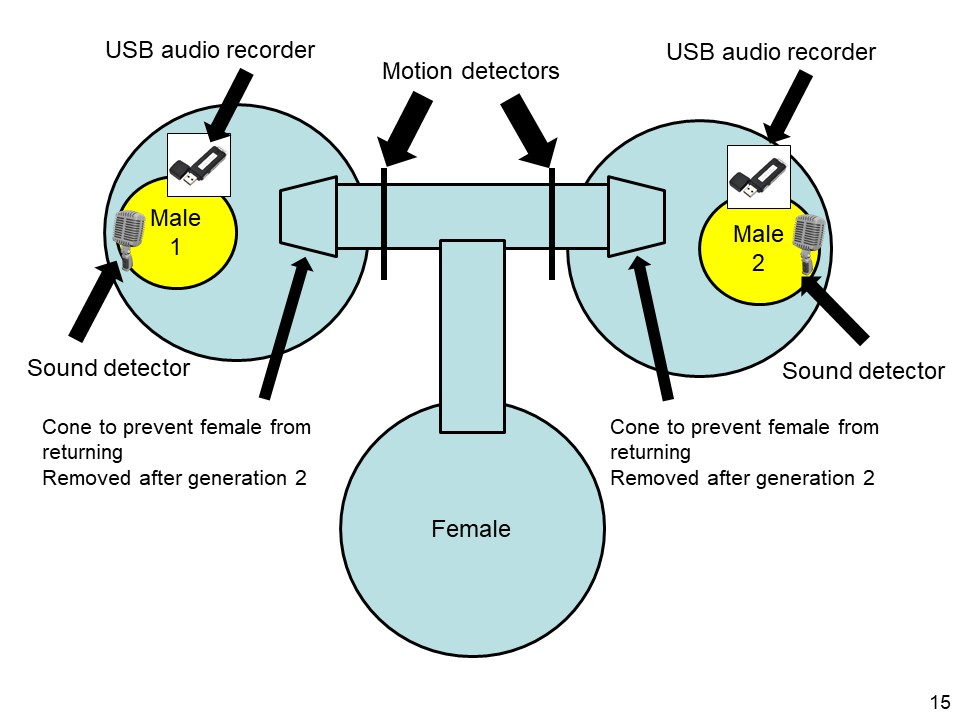


**
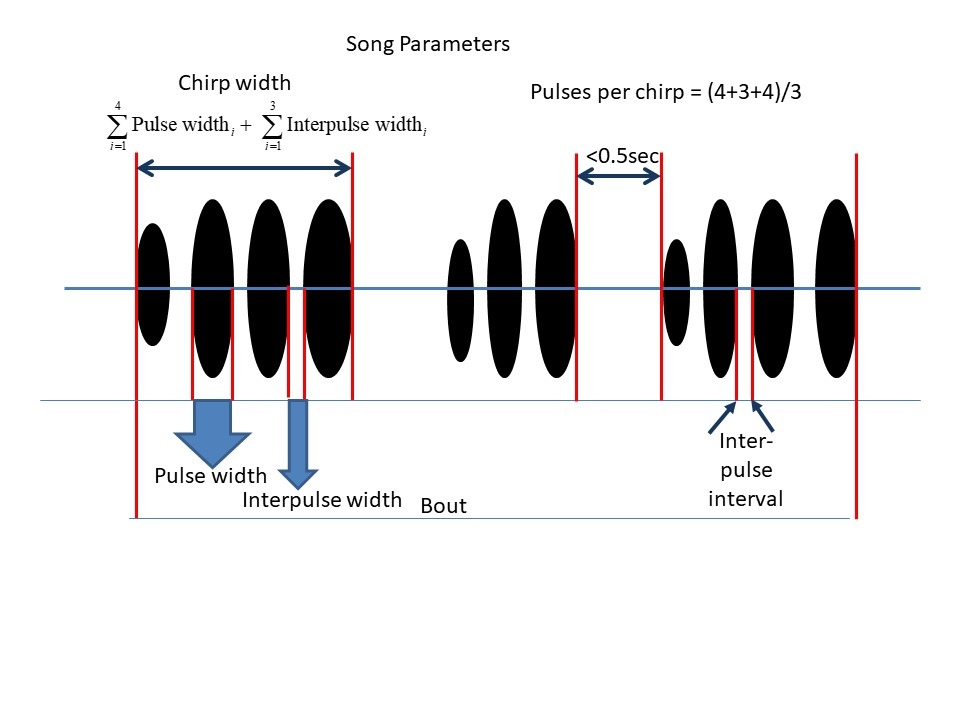
Figure S2:** Diagram of song components

**Analysis of Stabilizing Preference**

In stabilizing preference female preference declines as the difference between her most preferred trait value and the one encountered increases. In this case I used an iterative approach, first assigning a proposed “most preferred” value, say *XP*, and then calculating the absolute difference between this value and the male’s value. This is done for each male and preference then calculated as for direct preference by regressing *Y*, as defined above, on *X=*abs(Focal male trait-*XP*)/(sum of abs(Focal male trait- *XP*)+abs(Other male trait- *XP*)). The value of *XP* is varied, preference calculated for each value and plotted against the correlation of *Y* on *X* (Roff and Fairbairn 2017). If preference is stabilizing the correlation coefficient *r* will show a humped shaped relationship with *XP*. Significant stabilizing preference requires that the regression is negative (hence *r* is negative) and statistically significant at the value of *XP* at which the -*r* is maximal. Simulation analysis suggests that a significant level of 5% is weak evidence of stabilizing preference but a *P* value of 1% or less is strong support (Roff and Fairbairn 2017).

Theory is not a good guide to whether differences in stabilizing preference should be observed between the R and S lines. Therefore, I tested for differences between lines without an a priori prediction on the direction of change that might occur. To test for differences in detected stabilizing preference I used the following randomization test. First, I determined the most preferred male trait value for each line separately. Next I calculated the absolute difference between the two estimates, *dobs*. I then randomly assigned individuals to the S or R populations and reran the stabilization testing protocol, determining the two preferred male trait values, thence the absolute difference between them, *di*. This process was repeated *n* times giving *n* values of *di*.*.* The probability of observing a *di* greater than or equal to *d*obs is estimated as {(Number of *di* ≥ *dobs* )+1}/(n+1). The “extra” 1 is required because the observed value is itself a sample and thus must be counted (Roff 2006). If the true probability is close to 0.05 then a sample size of 1,000 or more may be necessary to take into account the standard error of the estimated probability (Roff 2006). Because of the time required to run such a large number of runs, in the present analysis I used a sequential approach, first running 100 randomizations and increasing the number only if the estimated probability was less than 0.20 since the 95% confidence range is , which excludes 0.05.

REFERENCE: Roff DA (2006). Introduction to Computer-Intensive Methods of Data Analysis in Biology. Cambridge University Press: Cambridge.

**Figure S3**: Distribution of PC scores for male song components. Traits are arranged according to ranking of PC1.

**Figure S4.** Plots of four traits showing stabilizing preference. Dashed line shows value of the correlation at which *P*=0.05 for the combined data set.

**Figure S5:** Correspondence between the genetic and phenotypic correlations in the song components. Dotted line shows 1:1 relationship. Solid line shows regression of genetic correlation on phenotypic correlation (*r*g=-0.082+0.853*r*p, *P*<0.0001)

**Figure S6:** Comparison of male traits in generations 3 and 11 that showed a significant generation by line interaction.
