# Supplementary material for: The Evolution of Female Preference, Male Traits and the G matrix: “Toto, I've a feeling we're not in Kansas anymore”
Source: Research Square preprint supplement (doi:10.21203/rs.3.rs-4195108/v1), 2024-04-15
Supplement: Supplementary file 2 [file fefd851cfa65fa3a608e786d.docx]

Table 1. Results of the analysis of female preference. Traits are ranked according to variance accounted for in the final model. Directional traits in which the slope of the S line matches the direction of change from generation 3 to 11 (Fig. 5) are shown in italics

| Song components | Final model | Statistics for final model | | Slope for lines | |
| --- | --- | --- | --- | --- | --- |
|  |  | *r*2*100 | *P* | Sd | R |
| CALL | *Directional, Fulla* | 8.638 | <10-15 | **0.134** | 0.083 |
| VOL | *Directional, Full* | 3.947 | <10-15 | **0.156** | 0.081 |
| CHIRP | *Directional, Full* | 3.071 | <10-10 | **0.352** | 0.157 |
| V.IPULSE.W | Directionalb | 2.074 | <10-8 | **-0.096** | -0.042 |
| PULSE | Stabilizingc | 1.323 | <10-5 | **-0.068** | -0.032 |
| CHIRP.W | Stabilizing | 1.316 | 0.0002 | -0.041 | -0.052 |
| PULSE.W | *Directional* | 1.040 | <10-4 | **0.182** | 0.137 |
| IPULSE.W | *Directional* | 0.920 | <10-4 | -0.104 | -0.140 |
| V.PULSE/CHIRP | *Directional* | 0.902 | <10-4 | **-0.057** | -0.016 |
| PULSE/CHIRP | Stabilizing | 0.797 | 0.0036 | -0.023 | -0.041 |
| V.CHIRP.W | *Directional* | 0.709 | 0.0005 | **-0.044** | -0.018 |
| FREQ | *Directional* | 0.693 | 0.0005 | **0.989** | 0.245 |
| V.FREQ | Stabilizing | 0.396 | 0.0122 | -0.028 | -0.048 |
| V.PULSE.W | Stabilizing | 0.316 | 0.0253 | **-0.035** | -0.021 |

a: Directional, Full= R.TRAIT+LINE+R.TRAITxLINE

b: Directional = R.TRAIT, significant but no significant difference between lines.

c: Stabilizing = Significant regression of *Y* on *X*, where *Y* = (Approaches by female to focal male)/(sum of approaches to each male), *X=*abs(Focal male trait-*XP*)/(sum of abs(Focal male trait- *XP*)+abs(Other male trait- *XP*)) and *X*P is the value at which –*r* is maximal.

d: Slopes in bold show cases in which the slope of the S line is steeper than that of the R line

Table 2. Coefficients in the multivariate female preference model. The three interaction terms have been absorbed into the two separate line equations and coefficients ranked according to the S line when the model using the entire data set was used. The last two columns show the results of fitting the multivariate female preference function to a reduced data set in which R.CALL is limited to the range 0.47 to 0.53.

| Variable | S | R | S | R |
| --- | --- | --- | --- | --- |
| Intercept | 0.332 | 0.508 | 0.270 | 0.179 |
| R.CHIRP | 0.234 | 0.059 | 0.354 | 0.354 |
| R.CALL | 0.127 | 0.127 |  |  |
| R.IPULSE.W | 0.038 | -0.069 | 0.265 | 0.265 |
| R.V.CHIRP.W | 0.028 | 0.028 | -0.095 | 0.035 |
| R.VOL | -0.017 | -0.11 |  |  |
| R.V.PULSE/CHIRP | -0.025 | -0.025 |  |  |
| S.PULSE | -0.047 | -0.047 | -0.145 | -0.145 |
| S.V.FREQ |  |  | 0.068 | 0.068 |
| S.V.PULSE.W |  |  | -0.035 | 0.025 |
| V.IPULSE.W |  |  | 0.025 | -0.168 |

Table 3. Heritability of female realized preference (SE) between two males and the genetic correlation (SE) between female realized preference and male trait. Estimates using the combined data set were calculated after correcting for significant fixed effects (NS=no significant effects). Estimates in bold are significantly different from zero.

|  |  |  |  |  |  |  |
| --- | --- | --- | --- | --- | --- | --- |
| Male trait | *h*2 | *r*g a | *r*g (S line)b | *r*g (R line)b | Fixed effects | Preference type |
| CALL | 0.03 (0.02) | 0.41 (0.27) | 0.30 (0.25) | 1.00 (B) | LINE*SEX | Positive |
| VOL | 0.01 (0.02) | 0.39 (0.50) | -0.18 (0.67) | 1.00 (B) | LINE | Positive |
| CHIRP | 0.00 (0.00)c | 1.00 (B)d | -1.00 (B) | 1.00 (B) | LINE | Positive |
| PULSE | **0.12 (0.04)** | 0.22 (0.19) | 0.22 (0.23) | 0.24 (0.33) | NS | Stabilizing |
| PULSE/CHIRP | **0.10 (0.04)** | 0.25 (0.21) | 0.26 (0.25) | 0.23 (0.36) | LINE | Stabilizing |
| V.PULSE/CHIRP | 0.05 (0.03) | 0.48 (0.32) | 0.35 (0.40) | 0.71 (0.69) | LINE | Negative |
| CHIRP.W | 0.04 (0.03) | 0.39 (0.31) | 0.43 (0.42) | 0.32 (0.45) | LINE | Stabilizing |
| V.CHIRP.W | 0.07 (0.04) | **0.82 (0.25)** | **0.88 (0.25)** | 0.62 (0.63) | LINE | Negative |
| FREQ | **0.08 (0.04)** | 0.18 (0.18) | 0.43 (0.22) | -0.35 (0.27) | LINE | Positive |
| V.FREQ | 0.00 (0.00) | -1.00 (B) | -1.00 (B) | -0.97 (0.64) | LINE | Stabilizing |
| PULSE.W | 0.05 (0.03) | 0.55 (0.47) | 0.31 (0.71) | 0.83 (0.57) | LINE | Positive |
| V.PULSE.W | 0.00 (0.03) | 0.33 (1.66) | 0.34 (4.98) | 0.67 (1.78) | LINE | Stabilizing |
| IPULSE.W | **0.09 (0.04)** | **0.85 (0.24)** | **0.79 (0.25)** | 1.00 (B) | NS | Negative |
| V.IPULSE.W | 0.03 (0.02) | 1.00 (B) | 1.00 (B) | 1.00 (B) | LINE | Negative |

a : Estimated using combined data set

b : Estimated for individual lines

c : 0.00 means estimate < 0.005

d : Estimate converged on the boundary of ±1.

Table 4. Heritability of song components, significant fixed effect differences between lines and genetic correlation between wing morphs.

| Trait | Heritability (SE) | | | Fixed | Genetic correlation (SE) | | |
| --- | --- | --- | --- | --- | --- | --- | --- |
|  | Combined | S line | R line | Effectsa | Combined | S line | R line |
| CALL | 0.29 (0.04) | 0.27 (0.05) | 0.34 (0.07) | L*W | 0.82 (0.13) | 0.79 (0.17) | 0.86 (0.20) |
| VOL | 0.15 (0.03) | 0.11 (0.03) | 0.25 (0.06) | L+W | 0.74 (0.20) | 0.55 (0.31) | 1.00b |
| CHIRP | 0.18 (0.03) | 0.15 (0.04) | 0.23 (0.07) | NS | 1.00 | 1.00 | 0.90 (0.34) |
| PULSE | 0.18 (0.03) | 0.20 (0.04) | 0.15 (0.06) | W | 1.00 | 1.00 | 0.44 (0.44) |
| PULSE/CHIRP | 0.16 (0.03) | 0.18 (0.04) | 0.11 (0.05) | L+W | 1.00 | 1.00 | 0.93 (1.55) |
| V.PULSE/CHIRP | 0.11 (0.03) | 0.07 (0.03) | 0.19 (0.07) | L | 0.94 (0.35) | 0.83 (0.62) | 1.00 |
| CHIRP.W | 0.17 (0.03) | 0.19 (0.04) | 0.13 (0.06) | L | 1.00 | 1.00 | 0.67 (0.96) |
| V.CHIRP.W | 0.15 (0.03) | 0.15 (0.04) | 0.15 (0.06) | L | 0.70 (0.24) | 0.98 (0.34) | 0.16 (0.44) |
| FREQ | 0.49 (0.05) | 0.53 (0.06) | 0.42 (0.08) | L+W | 0.90 (0.08) | 0.94 (0.08) | 0.73 (0.21) |
| V.FREQ | 0.09 (0.03) | 0.09 (0.03) | 0.09 (0.05) | L+W | 0.62 (0.48) | 0.56 (0.44) | 1.00 |
| PULSE.W | 0.03 (0.02) | 0.02 (0.03) | 0.07 (0.05) | L*W | 1.00 | nac | 1.00 |
| V.PULSE.W | 0.04 (0.02) | 0.04 (0.03) | 0.04 (0.05) | L | 0.82 (0.84) | 1.00 | -0.00 (1.16) |
| IPULSE.W | 0.11 (0.03) | 0.12 (0.04) | 0.10 (0.05) | L*W | 1.00 | 0.91 (0.36) | 1.00 |
| V.IPULSE.W | 0.09 (0.03) | 0.08 (0.03) | 0.12 (0.06) | L | 1.00 | 0.80 (0.61) | 1.00 |

a: L=Line, W=Wing: L*W= L+W+LxW, NS=no significant fixed effect

b: No SE because estimate at boundary value

c: No estimate because heritabilities too small for accurate calculation

Table 5. Genetic correlations between song components. Correlations above diagonal, SEs below the diagonal. Estimates significantly different from zero are shown in bold.

|  |  | 1 | 2 | 3 | 4 | 5 | 6 | 7 | 8 | 9 | 10 | 11 | 12 | 13 | 14 |
| --- | --- | --- | --- | --- | --- | --- | --- | --- | --- | --- | --- | --- | --- | --- | --- |
| 1 | CALL |  | **0.77** | **0.51** | 0.21 | 0.16 | **-0.58** | 0.02 | **-0.65** | **0.39** | -0.19 | 0.12 | **0.42** | **-0.43** | **-0.66** |
| 2 | VOL | 0.06 |  | **0.57** | 0.10 | -0.20 | -0.21 | **-0.27** | **-0.46** | **0.29** | -0.06 | **0.48** | **0.74** | **-0.57** | **-0.35** |
| 3 | CHIRP | 0.10 | 0.11 |  | 0.24 | **-0.35** | -0.01 | **-0.48** | -0.22 | **0.26** | -0.01 | -0.21 | 0.22 | -0.09 | -0.05 |
| 4 | PULSE | 0.13 | 0.15 | 0.14 |  | 0.06 | -0.18 | **-0.45** | **-0.48** | 0.18 | 0.05 | **-0.57** | 0.29 | **-0.57** | **-0.46** |
| 5 | PULSES/CHIRP | 0.12 | 0.13 | 0.13 | 0.14 |  | **-0.54** | **0.84** | **-0.54** | 0.04 | **-0.33** | -0.09 | 0.12 | **-0.61** | **-0.54** |
| 6 | V.PULSES/CHIRP | 0.11 | 0.17 | 0.17 | 0.17 | 0.14 |  | **-0.51** | **0.89** | -0.09 | **0.50** | **-0.66** | -0.36 | **0.52** | **0.72** |
| 7 | CHIRP.W | 0.13 | 0.13 | 0.11 | 0.11 | 0.04 | 0.13 |  | **-0.37** | -0.09 | **-0.37** | 0.16 | -0.05 | **-0.29** | **-0.31** |
| 8 | V.CHIRP.W | 0.09 | 0.13 | 0.14 | 0.15 | 0.12 | 0.05 | 0.12 |  | **-0.24** | **0.38** | **-0.57** | **-0.70** | **0.69** | **0.68** |
| 9 | FREQ | 0.08 | 0.11 | 0.10 | 0.11 | 0.11 | 0.13 | 0.11 | 0.11 |  | 0.12 | -0.17 | 0.17 | -0.07 | -0.01 |
| 10 | V.FREQ | 0.15 | 0.18 | 0.18 | 0.18 | 0.17 | 0.16 | 0.16 | 0.16 | 0.13 |  | -0.31 | 0.16 | 0.21 | **0.40** |
| 11 | PULSE.W | 0.20 | 0.22 | 0.25 | 0.16 | 0.20 | 0.20 | 0.20 | 0.19 | 0.19 | 0.27 |  | 0.31 | -0.39 | -0.36 |
| 12 | V.PULSE.W | 0.21 | 0.24 | 0.24 | 0.23 | 0.20 | 0.30 | 0.21 | 0.24 | 0.18 | 0.27 | 0.36 |  | **-0.75** | -0.06 |
| 13 | IPULSE.W | 0.12 | 0.12 | 0.16 | 0.17 | 0.12 | 0.15 | 0.14 | 0.11 | 0.13 | 0.19 | 0.21 | 0.17 |  | **0.79** |
| 14 | V.IPULSE.W | 0.11 | 0.16 | 0.17 | 0.21 | 0.15 | 0.10 | 0.15 | 0.11 | 0.14 | 0.18 | 0.24 | 0.29 | 0.13 |  |

Table 6. Results of stepwise regression of trait on Generation (G), Line (L), and Age (A) across generations 3 and 11. The table has been arranged with traits showing significant G*L interaction shown first as these are consistent with the hypothesis that these traits have responded to selection by female preference.

| Trait | Equationa | F(df1,df2)b | Pc | Change over generationsd | Female preferencee | Simulation resultsf |
| --- | --- | --- | --- | --- | --- | --- |
| VOL | G+L+G*L+A | 6.13(4,3322) | <10-5 | POS/NEG | POS | POS |
| FREQ | G+L+G*L | 15.06(3,2655) | <10-8 | POS | POS | POS |
| V.PULSES/CHIRP | G+L+G*L | 18.54(3,2655) | <10-11 | NEG | NEG | NEG |
| V.CHIRP.W | G+L+G*L | 26.82(3,2655) | <10-15 | NEG | NEG | NEG |
| V.FREQ | G+L+G*L | 9.18(3,2655) | <10-5 | NEG | STAB | NEG |
| V.PULSE.W | G+L+G*L | 3.44(3,2655) | 0.016 | POS/NEG | NEG | POS |
| CHIRP.W | G+L | 34.21(2,2656) | <10-14 | NEG | STAB | NEG |
| CHIRP | G+L | 6.68(2,2656) | 0.001 | POS | POS | POS |
| V.IPULSE.W | G+L | 7.82(2,2656) | 0.002 | NEG | NEG | NEG |
| PULSES/CHIRP | G+L | 39.15(2,2656) | <10-15 | NEG (NS) | STAB | NEG |
| IPULSE.W | G+A | 8.85(2,2656) | <10-3 | NEG | NEG | NEG |
| CALL | L+A | 11.13(2,3324) | <10-4 | NEG(NS) | POS | POS |
| PULSE.W | G | 13.46(1,2657) | 0.001 | POS | POS | NEG |
| PULSE | NS | na | na | POS/NEG(NS) | STAB | NEG |

a: Shows the final model structure from the stepwise analysis.

b: F statistic for final model.

c: Probability for final model.

d: Change in trait value across generations. POS=trait value increased, NEG=trait value decreased, NS=not significant. Where the lines differ in their response the result for the S line is given first.

e: See Table 3

f: Mean direction of change predicted by simulation model.

Table 7. Results of simulated response to 8 generations of female preference. **β** values are per generation values (SE<0.004). Results have been ranked by **β** (average per generation). Sample size=100. Response is in sd units.

|  |  | Mean response over 8 generations | | | Standard Errors | | |
| --- | --- | --- | --- | --- | --- | --- | --- |
| Trait | beta | Total | Direct | Indirect | Total | Direct | Indirect |
| CALL | 0.15 | 0.07 | 0.18 | -0.11 | 0.019 | 0.004 | 0.020 |
| VOL | 0.10 | 0.49 | 0.06 | 0.43 | 0.042 | 0.002 | 0.042 |
| CHIRP | 0.08 | 0.25 | 0.06 | 0.19 | 0.024 | 0.002 | 0.024 |
| FREQ | 0.03 | 0.19 | 0.07 | 0.12 | 0.021 | 0.007 | 0.020 |
| PULSE.W | 0.01 | -0.39 | 0.00 | -0.39 | 0.098 | 0.001 | 0.099 |
| IPULSE.W | 0.00 | -0.58 | 0.00 | -0.58 | 0.132 | 0.002 | 0.132 |
| CHIRP.W | -0.01 | -0.13 | -0.01 | -0.12 | 0.066 | 0.002 | 0.066 |
| PULSE | -0.01 | -0.70 | -0.01 | -0.69 | 0.142 | 0.003 | 0.141 |
| PULSE/CHIRP | -0.02 | -0.80 | -0.01 | -0.79 | 0.179 | 0.002 | 0.179 |
| V.PULSE.W | -0.03 | 0.04 | 0.00 | 0.05 | 0.026 | 0.001 | 0.027 |
| V.CHIRP.W | -0.03 | -0.44 | -0.02 | -0.42 | 0.063 | 0.002 | 0.062 |
| V.IPULSE.W | -0.03 | -0.17 | -0.01 | -0.16 | 0.033 | 0.001 | 0.032 |
| V.FREQ | -0.04 | -0.11 | -0.01 | -0.10 | 0.027 | 0.001 | 0.026 |
| V.PULSE/CHIRP | -0.04 | -0.26 | -0.02 | -0.24 | 0.073 | 0.002 | 0.071 |
